# Supplementary material for: Continuous measurements of valley floor width in mountainous landscapes
Source: Copernicus journal article supplement (doi:10.5194/esurf-2022-2), 2022-02-01
Supplement: Supplementary file 1 [file esurf-2022-2-supplement-version3.zip]

## Parameter files for valley floor width extraction using LSDTopoTools

Fiona Clubb, December 2021

Durham University, [fiona.j.clubb@durham.ac.uk](mailto:fiona.j.clubb@durham.ac.uk)

To supplement Clubb et al. (2022) Continuous measurements of valley floor width in mountainous landscapes, *Earth Surface Dynamics Discussions*

---

This directory contains the parameter files needed to reproduce the valley floor width extraction for the landscapes analysed in Clubb et al. (2022). The sub-directories contains the files for each landscape consisting of:

- **coords\_csv**: a CSV file containing the latitude and longitude of the upstream point on the river network, used as a starting point for the valley floor extraction.
- **LSDTT\_valleys.param**: the parameter file used to run LSDTopoTools on each landscape, with the parameter choices used (including channel relief and slope thresholds) for valley floor identification.
- **DEM\_name.hdr**: the ENVI .hdr file for each DEM, which gives the coordinate bounding box. This can be used to download the DEM.

---

For instructions on how to install LSDTopoTools and run the valley extraction tools please see our documentation, or visit our GitHub repo.
