# Supplementary material for: Continuous measurements of valley floor width in mountainous landscapes
Source: Copernicus journal article supplement (doi:10.5194/esurf-2022-2), 2022-02-01
Supplement: Supplementary file 3 [file esurf-2022-2-supplement-version4.zip]

This supplement contains the following sections:

- Additional plots for the Cumberland Plateau: Supplementary Figure S1 shows additional width-area plots for the Cumberland Plateau; Supplementary Figures S2 and S3 show width against distance downstream for each channel.
- Additional plots for the Appalachian Plateau: Supplementary Figure S4 shows width against distance downstream for each river.
- Supplementary Table S1 documenting the thresholds for slope and elevation used for each field site.

## 1 Additional plots for Cumberland Plateau

This section presents additional plots for the Cumberland Plateau analysis to supplement main text Section 4.1.

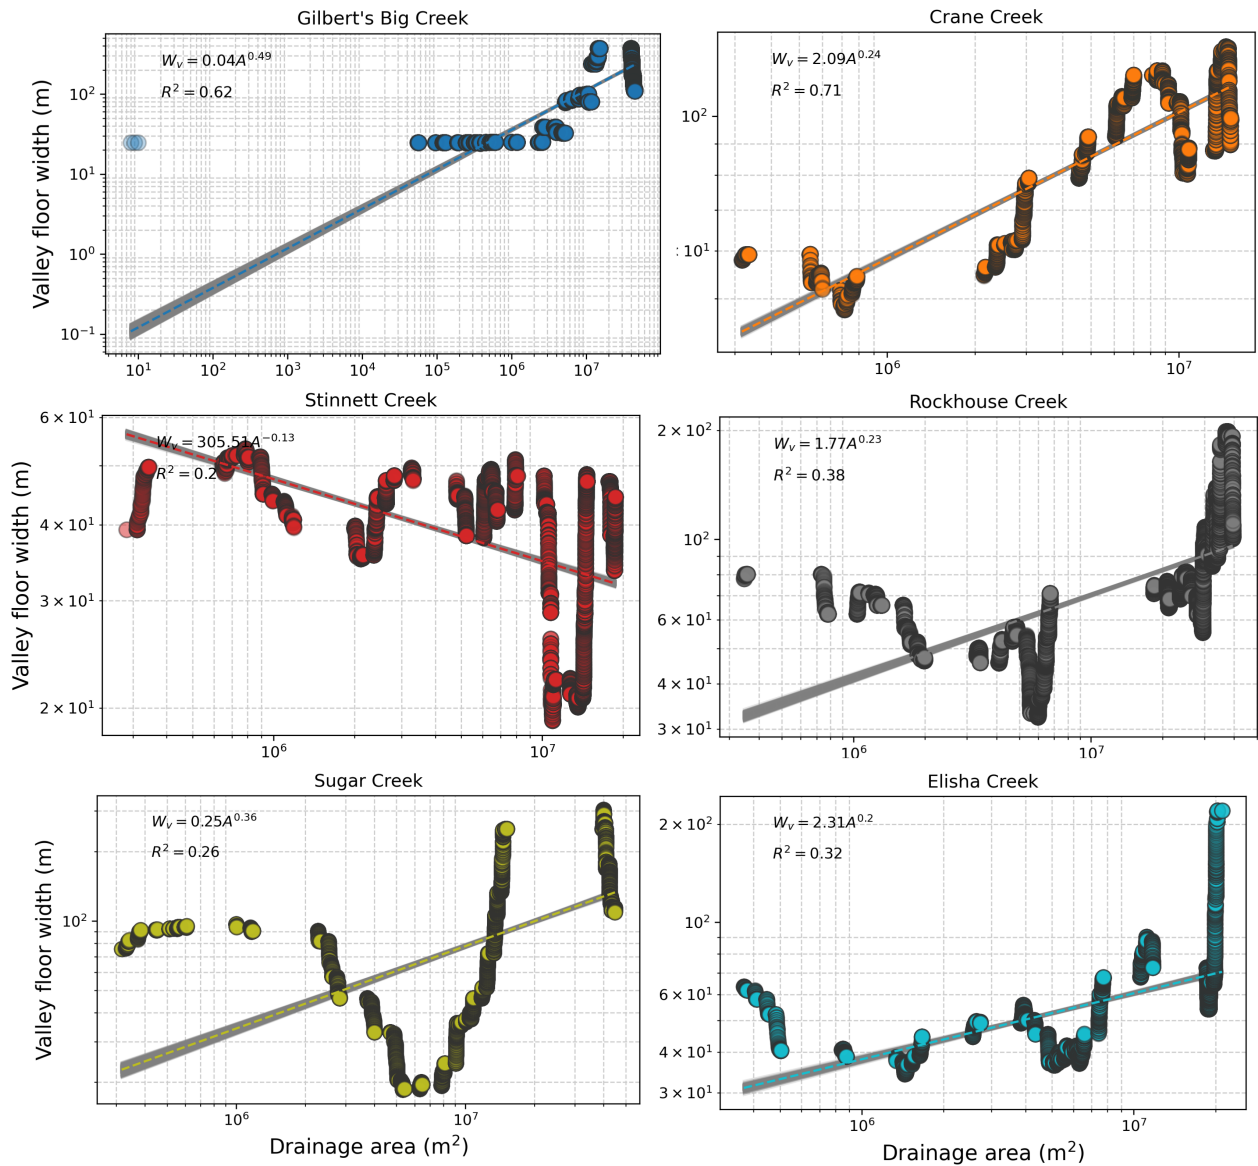

Figure S1: Width-area plots for the Cumberland Plateau creeks not shown in main text Figure 11. The dashed line represents a linear regression through the data in log-log space (power law). The grey bars represent confidence intervals on the regressions, calculated by bootstrapping the data 1000 times with a 50% sample size.

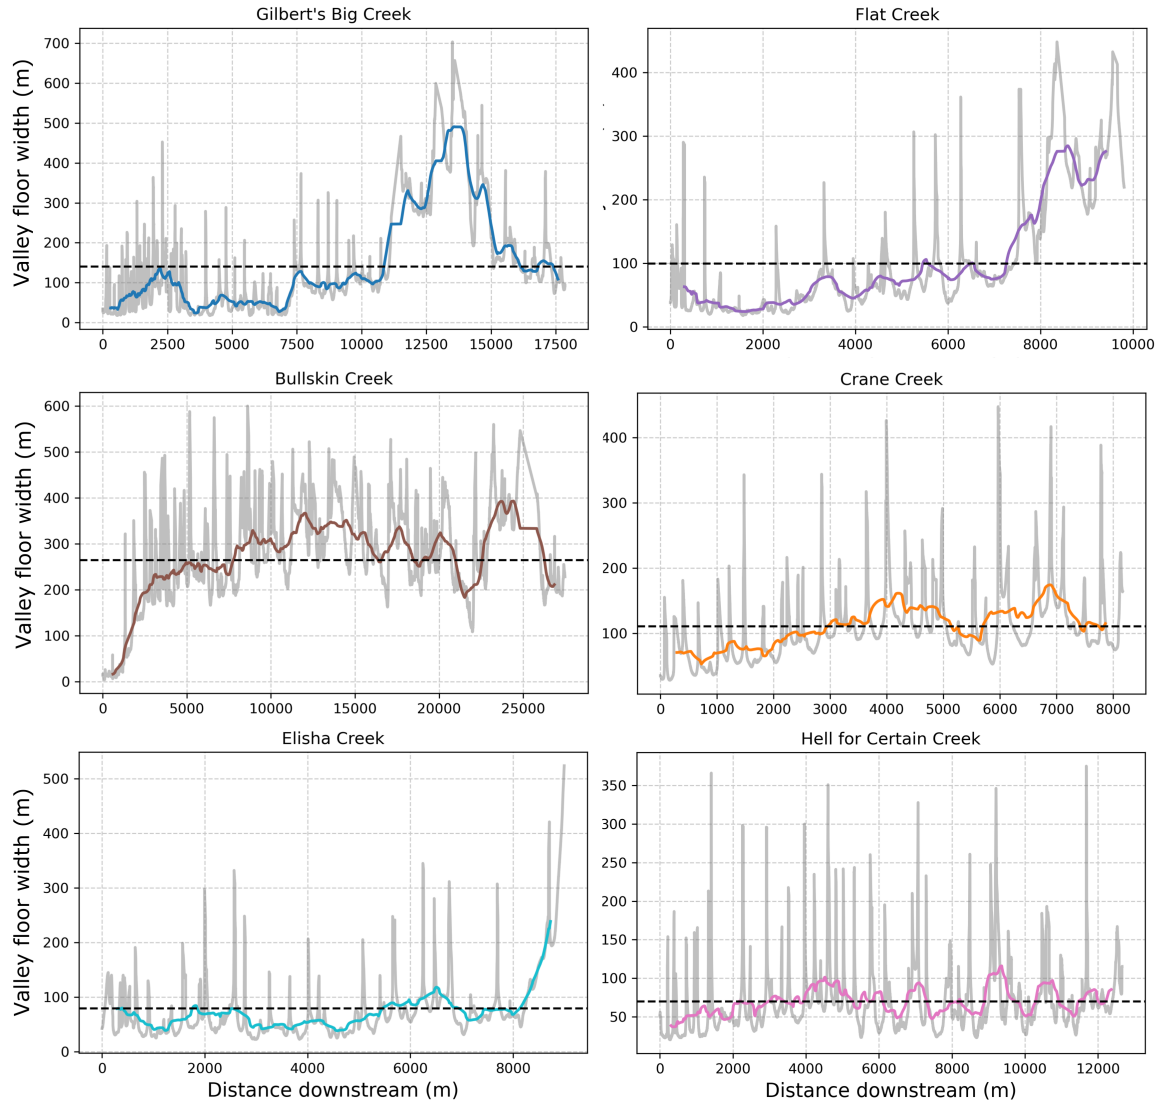

Figure S2: Width vs distance downstream for the small creeks analysed in the Cumberland Plateau. The grey data represents the raw data; coloured lines show a rolling mean through those data over a reach of 500 pixels. The dashed black line shows the mean width for each basin.

## 2 Additional plots for Appalachian Plateau

This section presents additional plots for the Appalachian Plateau to supplement main text Section 4.2.

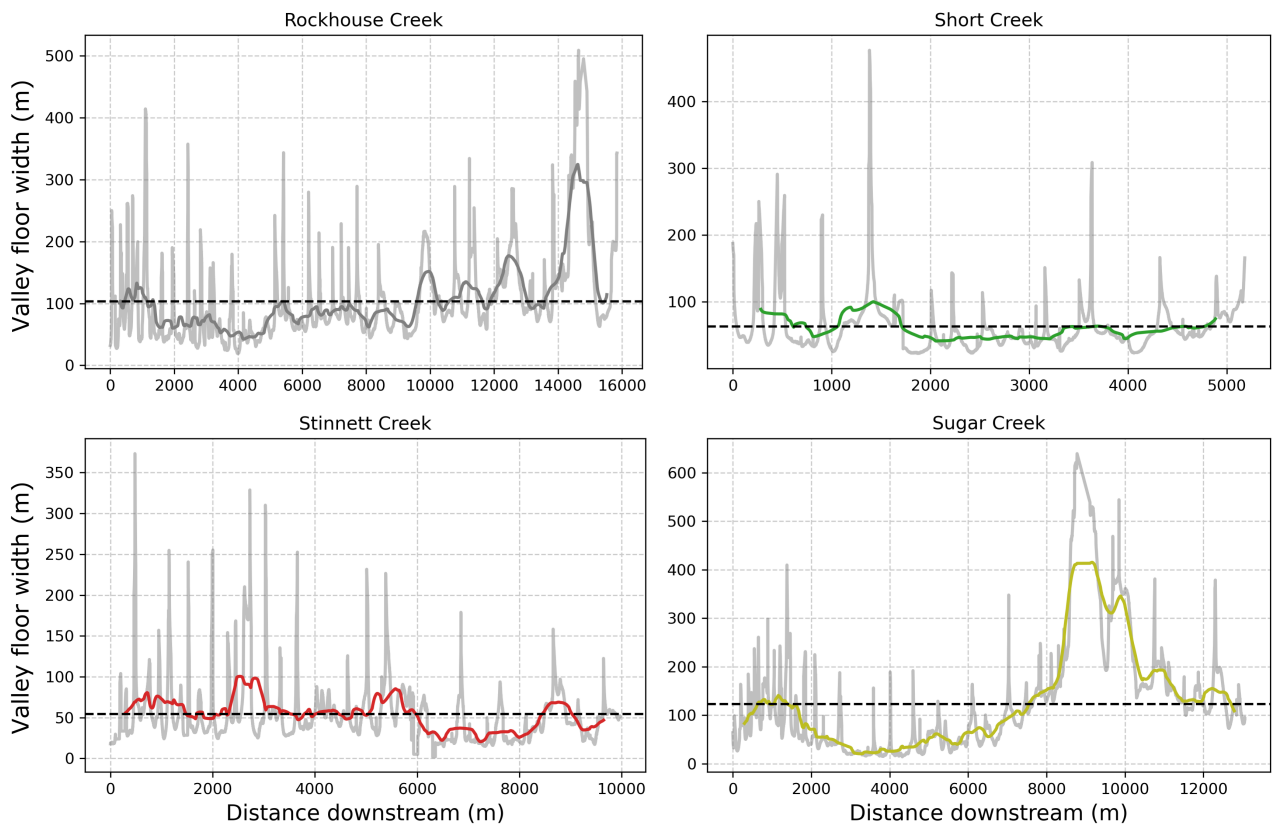

Figure S3: Width vs distance downstream for the small creeks analysed in the Cumberland Plateau. The grey data represents the raw data; coloured lines show a rolling mean through those data over a reach of 500 pixels. The dashed black line shows the mean width for each basin.

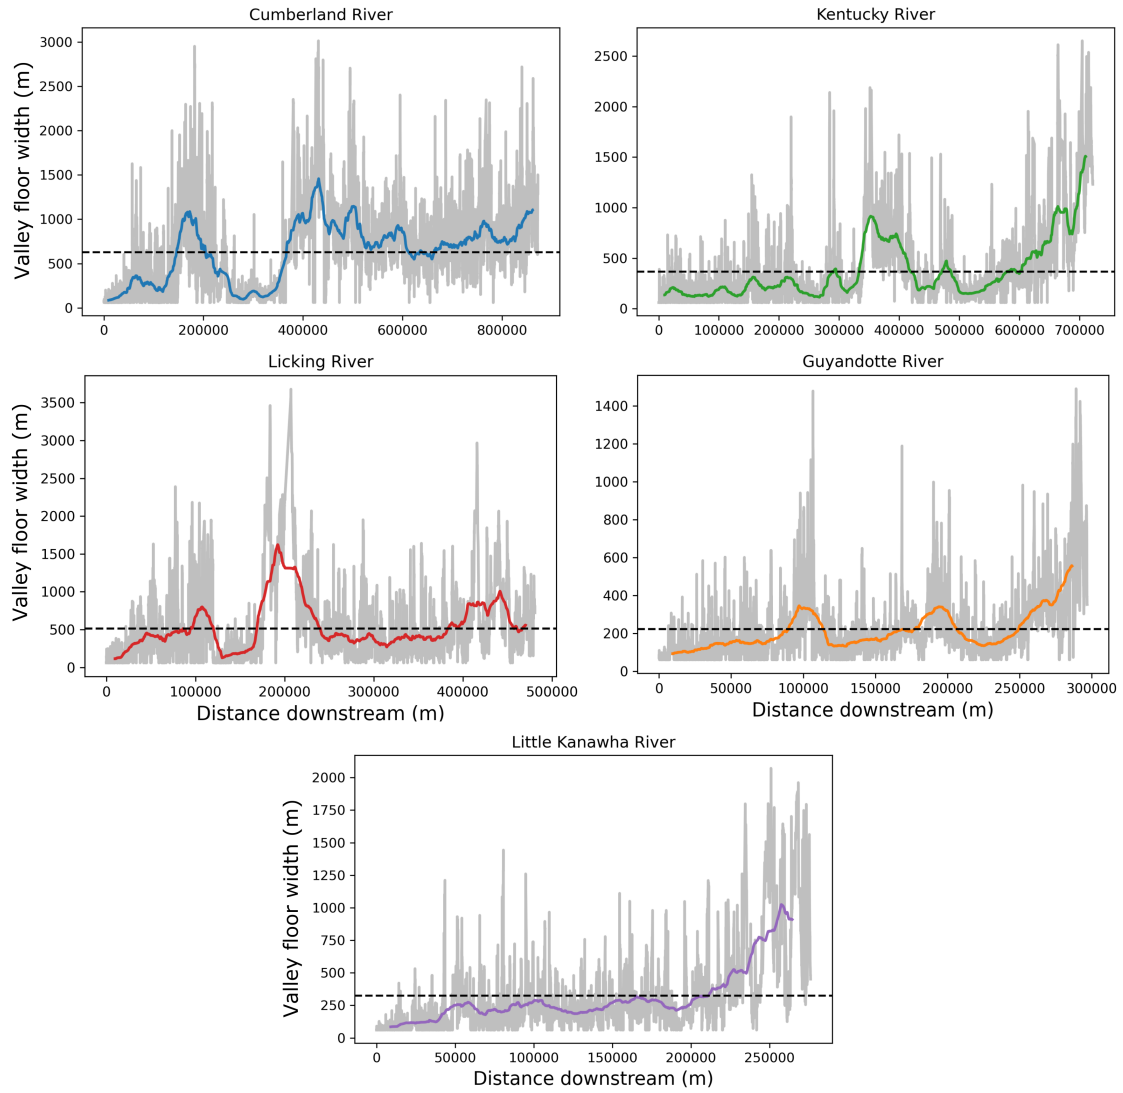

Figure S4: Width vs distance downstream for the large rivers analysed in the Appalachian Plateau. The grey data represents the raw data; coloured lines show a rolling mean through those data over a reach of 500 pixels. The dashed black line shows the mean width for each basin.

### 3 Thresholds for extracting floodplains

This section documents the thresholds used to extract the floodplains for each field site.

| Field site           | Relief threshold (m) | Slope threshold (m) | Node spacing | Search distance (m) |
|----------------------|----------------------|---------------------|--------------|---------------------|
| River Tweed          | 10                   | 0.1                 | 100          | 400                 |
| Weardale             | 25                   | 0.1                 | 200          | 400                 |
| Russian River        | 20                   | 0.1                 | 100          | 200                 |
| Bullskin Creek       | 10                   | 0.1                 | 100          | 150                 |
| Crane Creek          | 12                   | 0.1                 | 200          | 300                 |
| Elisha Creek         | 12                   | 0.1                 | 200          | 300                 |
| Flat Creek           | 12                   | 0.1                 | 200          | 300                 |
| Gilbert's Big Creek  | 12                   | 0.1                 | 200          | 300                 |
| Hell Creek           | 12                   | 0.1                 | 200          | 300                 |
| Rockhouse Creek      | 12                   | 0.1                 | 200          | 300                 |
| Short Creek          | 12                   | 0.1                 | 200          | 300                 |
| Stinnett Creek       | 12                   | 0.1                 | 200          | 300                 |
| Sugar Creek          | 12                   | 0.1                 | 200          | 300                 |
| Cumberland River     | 10                   | 0.05                | 50           | 50                  |
| Guyandotte River     | 10                   | 0.05                | 50           | 50                  |
| Kentucky River       | 10                   | 0.05                | 50           | 50                  |
| Licking River        | 10                   | 0.05                | 50           | 50                  |
| Little Kanawha River | 10                   | 0.05                | 50           | 50                  |

Table S1: Thresholds used to extract floodplains for each field site. The relief threshold is the elevation of each pixel above the nearest modern channel pixel from the D8 flow routing. The node spacing is spacing between individual channel nodes used to calculate the overall flow direction, from which width is measured along the orthogonal direction. Increasing the width node spacing smooths meanders along the valley. The search distance is the search radius from the modern channel to the edge of the valley which is used to identify the valley walls - this should be set as around half of the overall valley width.
