# Supplementary material for: Continuous measurements of valley floor width in mountainous landscapes
Source: Copernicus journal article supplement (doi:10.5194/esurf-2022-2), 2022-02-01
Supplement: Supplementary file 4 [file esurf-2022-2-supplement.pdf]

This supplement contains the following sections:

- Additional plots for the Cumberland Plateau: Supplementary Figure S1 shows additional width-area plots for the Cumberland Plateau; Supplementary Figures S2 and S3 show width against distance downstream for each channel.
- Additional plots for the Appalachian Plateau: Supplementary Figure S4 shows width against distance downstream for each river.

## 1 Additional plots for Cumberland Plateau

This section presents additional plots for the Cumberland Plateau analysis to supplement main text Section 4.1.

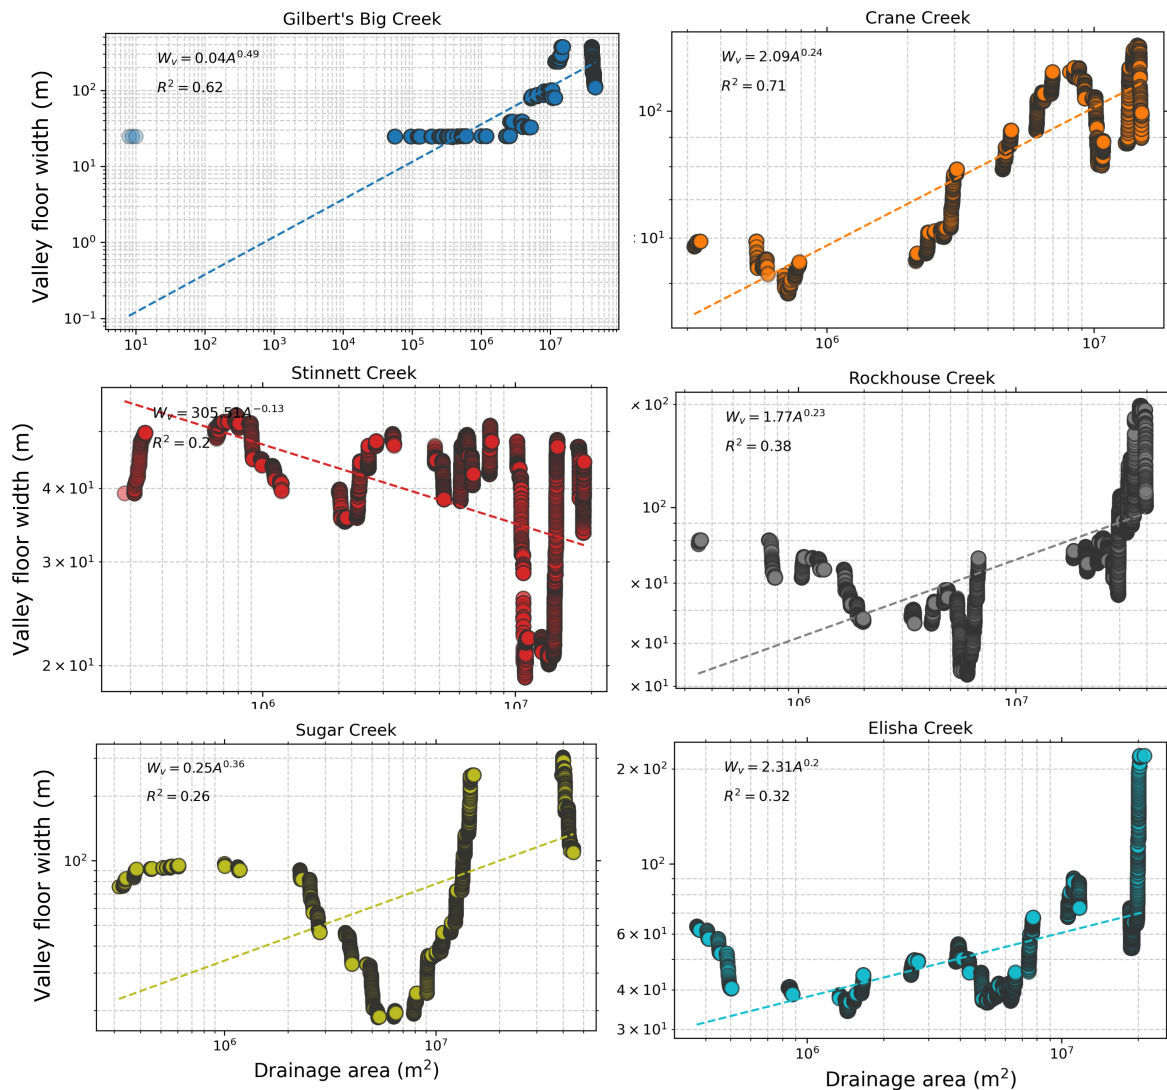

Figure S1: Width-area plots for the Cumberland Plateau creeks not shown in main text Figure 11. The dashed line represents a linear regression through the data in log-log space (power law).

## 2 Additional plots for Appalachian Plateau

This section presents additional plots for the Appalachian Plateau to supplement main text Section 4.2.

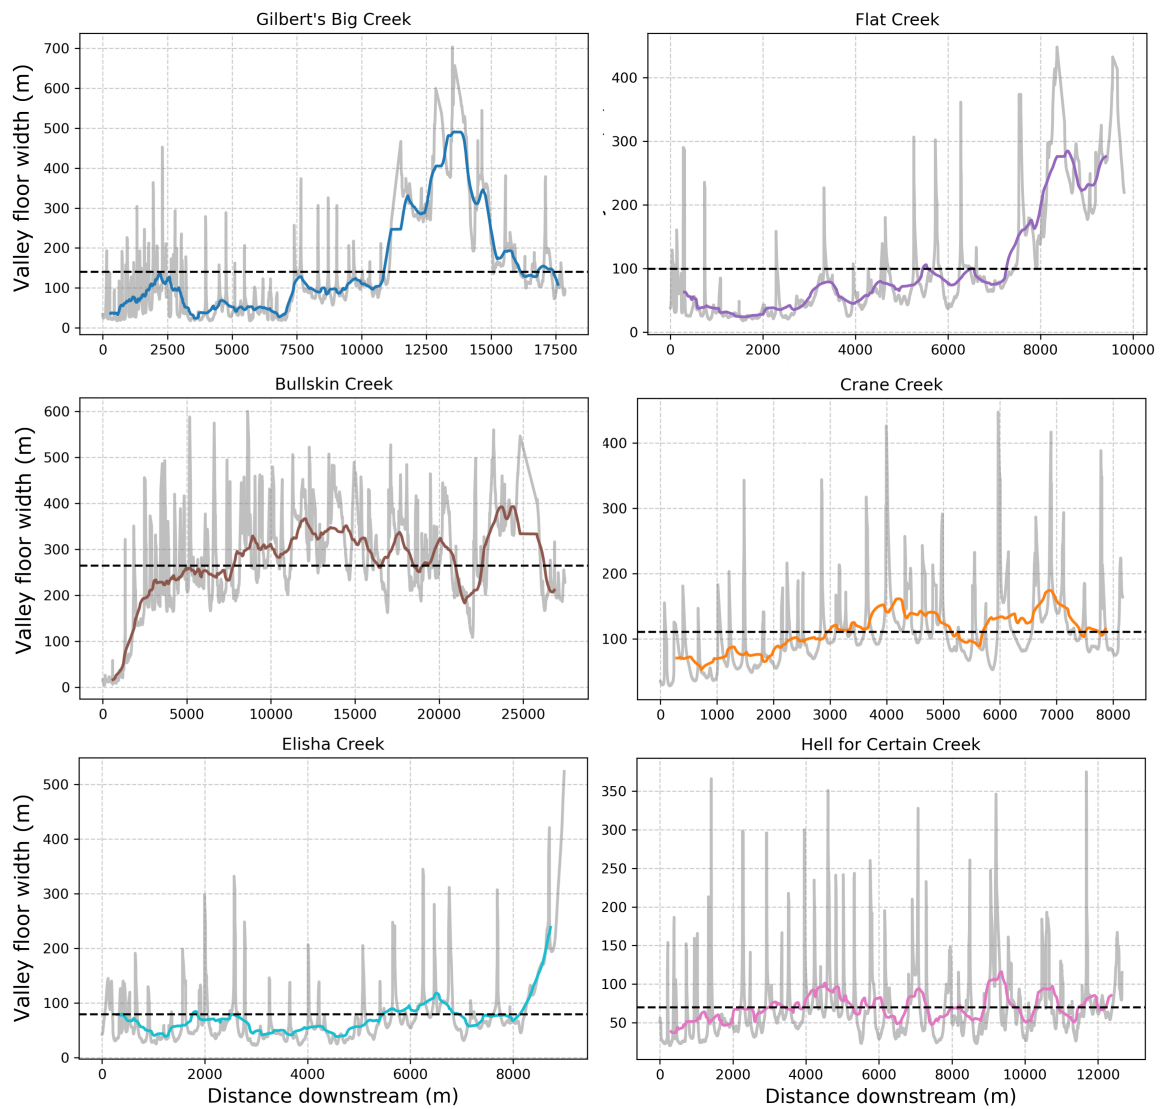

Figure S2: Width vs distance downstream for the small creeks analysed in the Cumberland Plateau. The grey data represents the raw data; coloured lines show a rolling mean through those data over a reach of 500 pixels. The dashed black line shows the mean width for each basin.

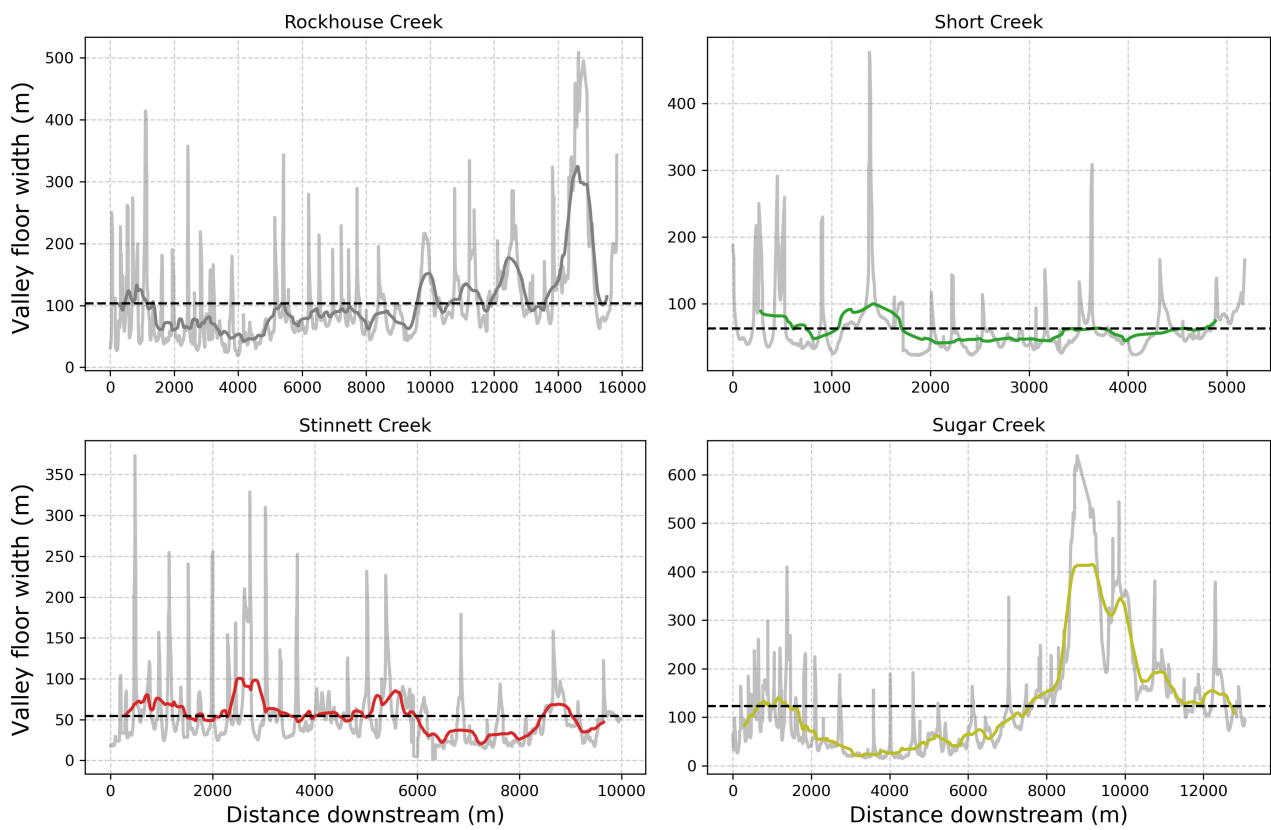

Figure S3: Width vs distance downstream for the small creeks analysed in the Cumberland Plateau. The grey data represents the raw data; coloured lines show a rolling mean through those data over a reach of 500 pixels. The dashed black line shows the mean width for each basin.

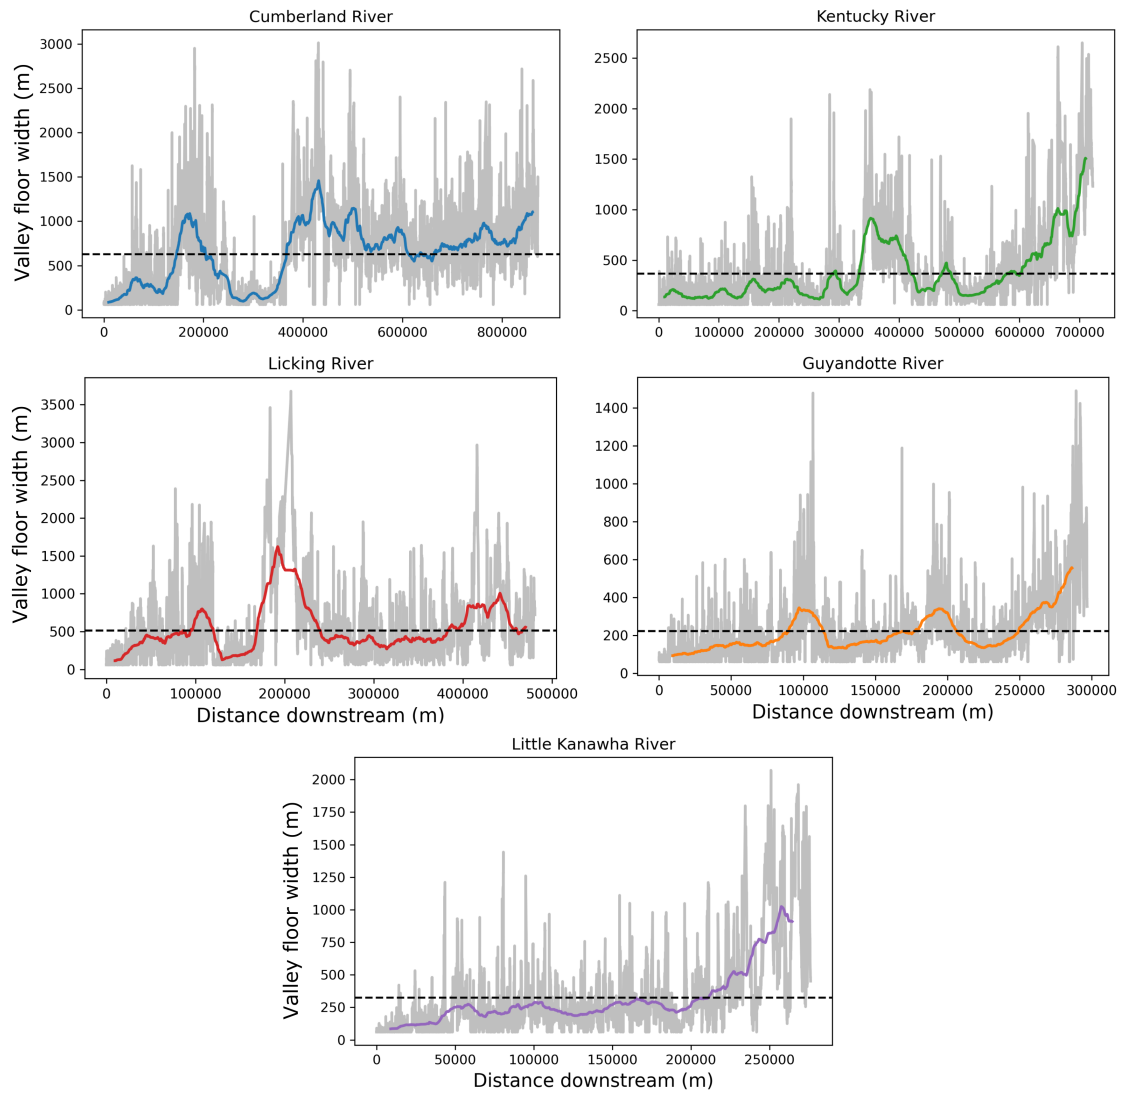

Figure S4: Width vs distance downstream for the large rivers analysed in the Appalachian Plateau. The grey data represents the raw data; coloured lines show a rolling mean through those data over a reach of 500 pixels. The dashed black line shows the mean width for each basin.
